# Supplementary material for: Resolving the mesoscale at reduced computational cost with FESOM 2.5: efficient modeling approaches applied to the Southern Ocean
Source: Copernicus journal article supplement (doi:10.5194/egusphere-2023-1496), 2023-07-14
Supplement: Supplementary file 1 [file egusphere-2023-1496-supplement.pdf]

Supplementary figures

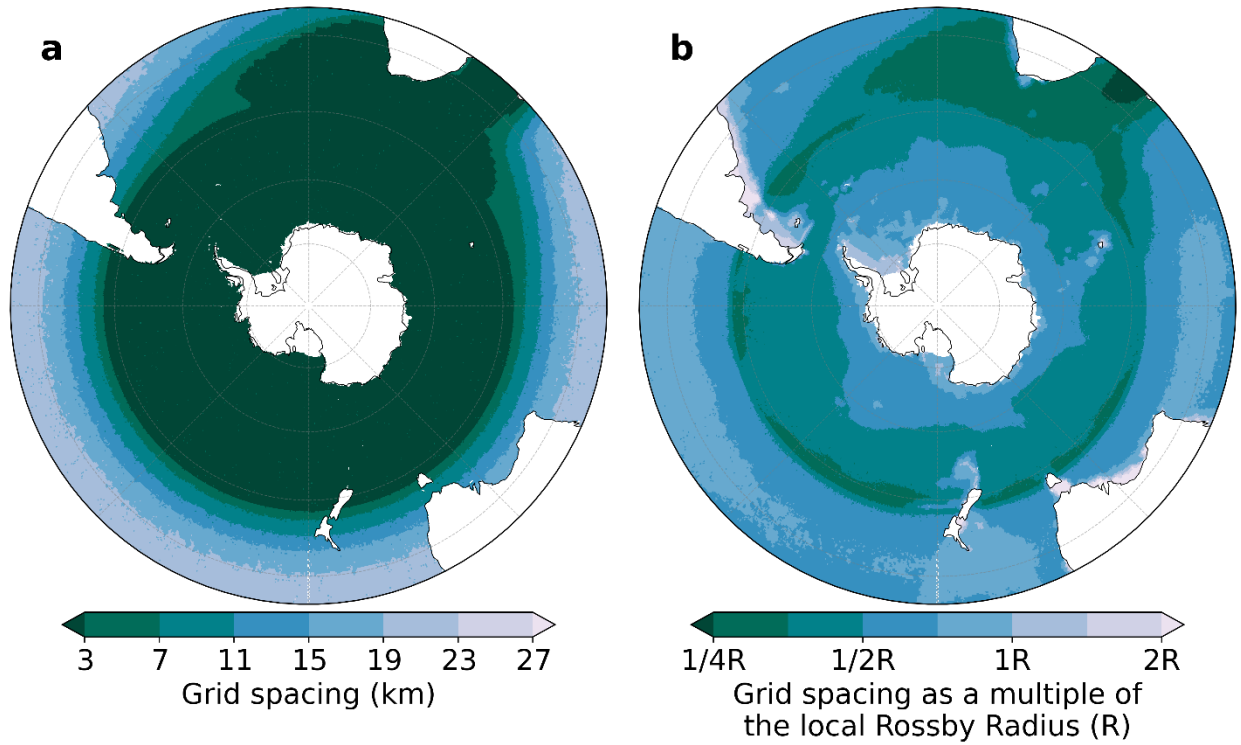

**Supplementary Figure 1. Grid resolution of the SO3 mesh. a)** grid resolution expressed as approximate node spacing. **b)** Grid resolution expressed as a multiple of the local Rossby radius.

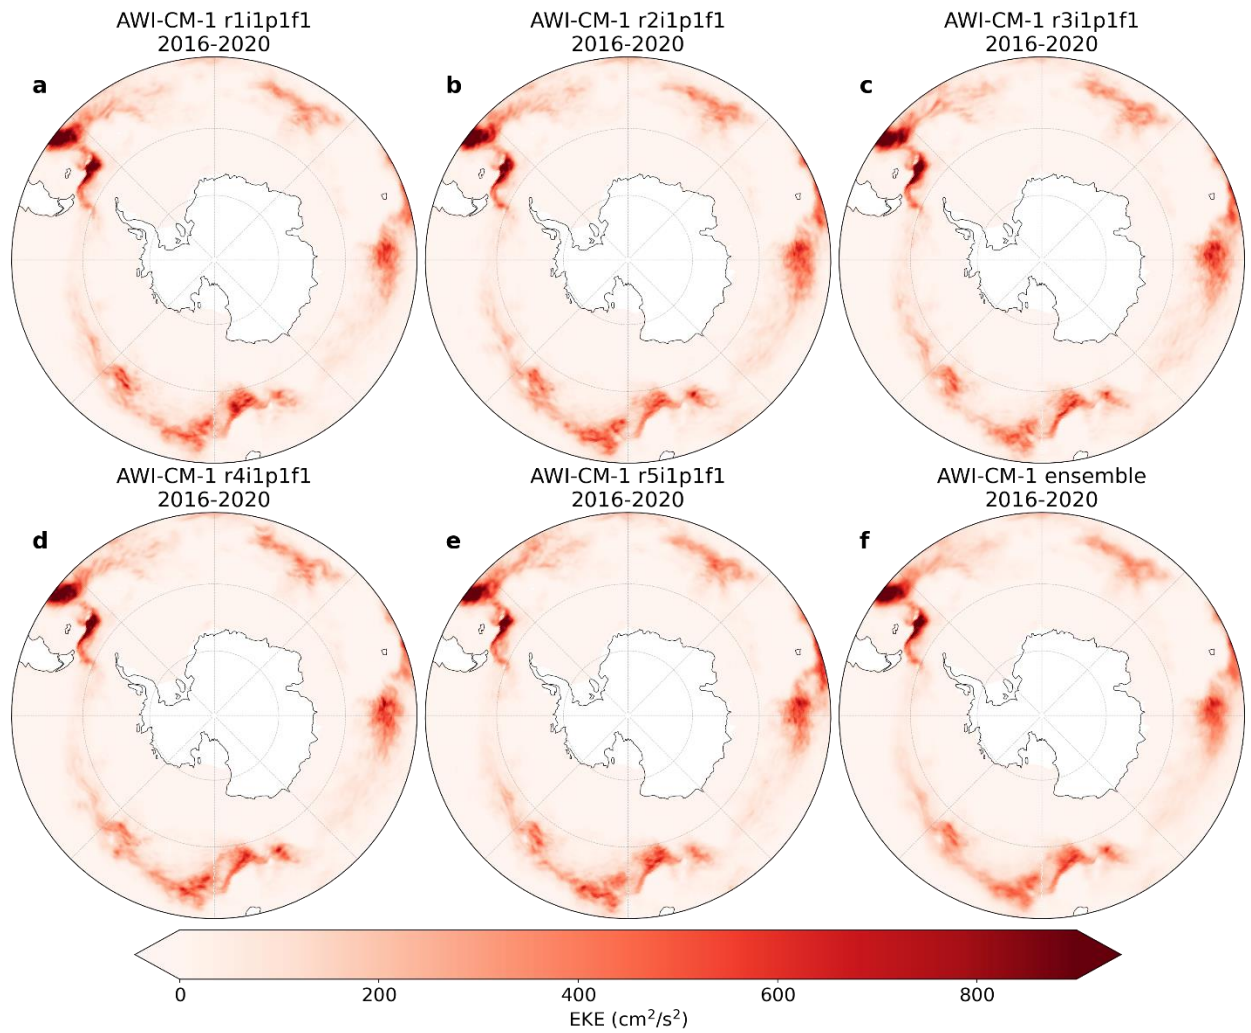

**Supplementary Figure 2. Ensemble spread of mean EKE.** Mean EKE during 2016-2020 in (a-e) each member of the AWI-CM-1 ensemble and (f) the ensemble mean.

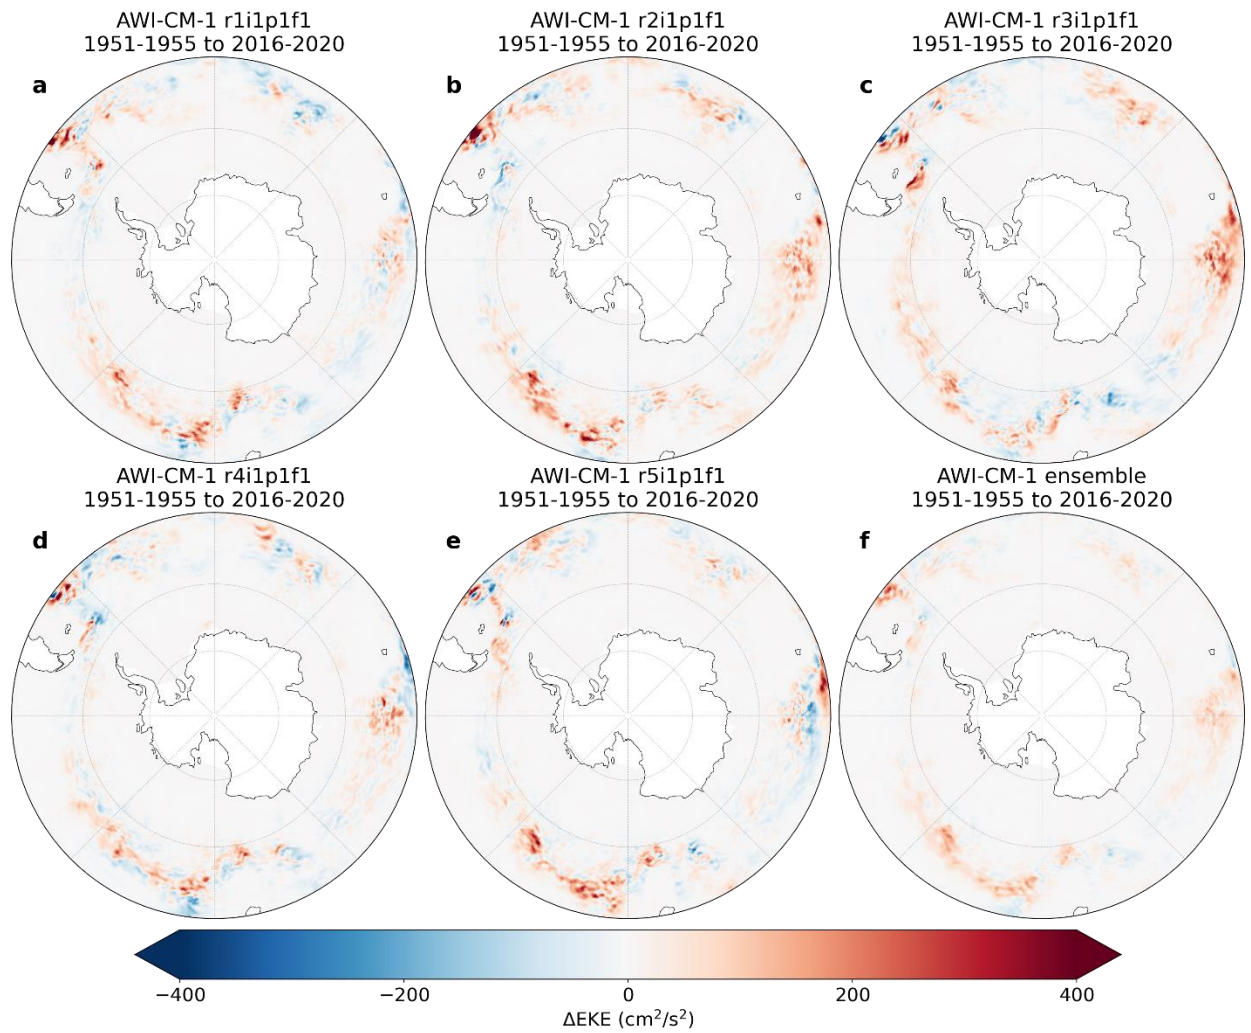

**Supplementary Figure 3. Ensemble spread of EKE change between 1951-1955 and 2016-2020. EKE change in (a-e) each member of the AWI-CM-1 ensemble and (f) the ensemble mean.**

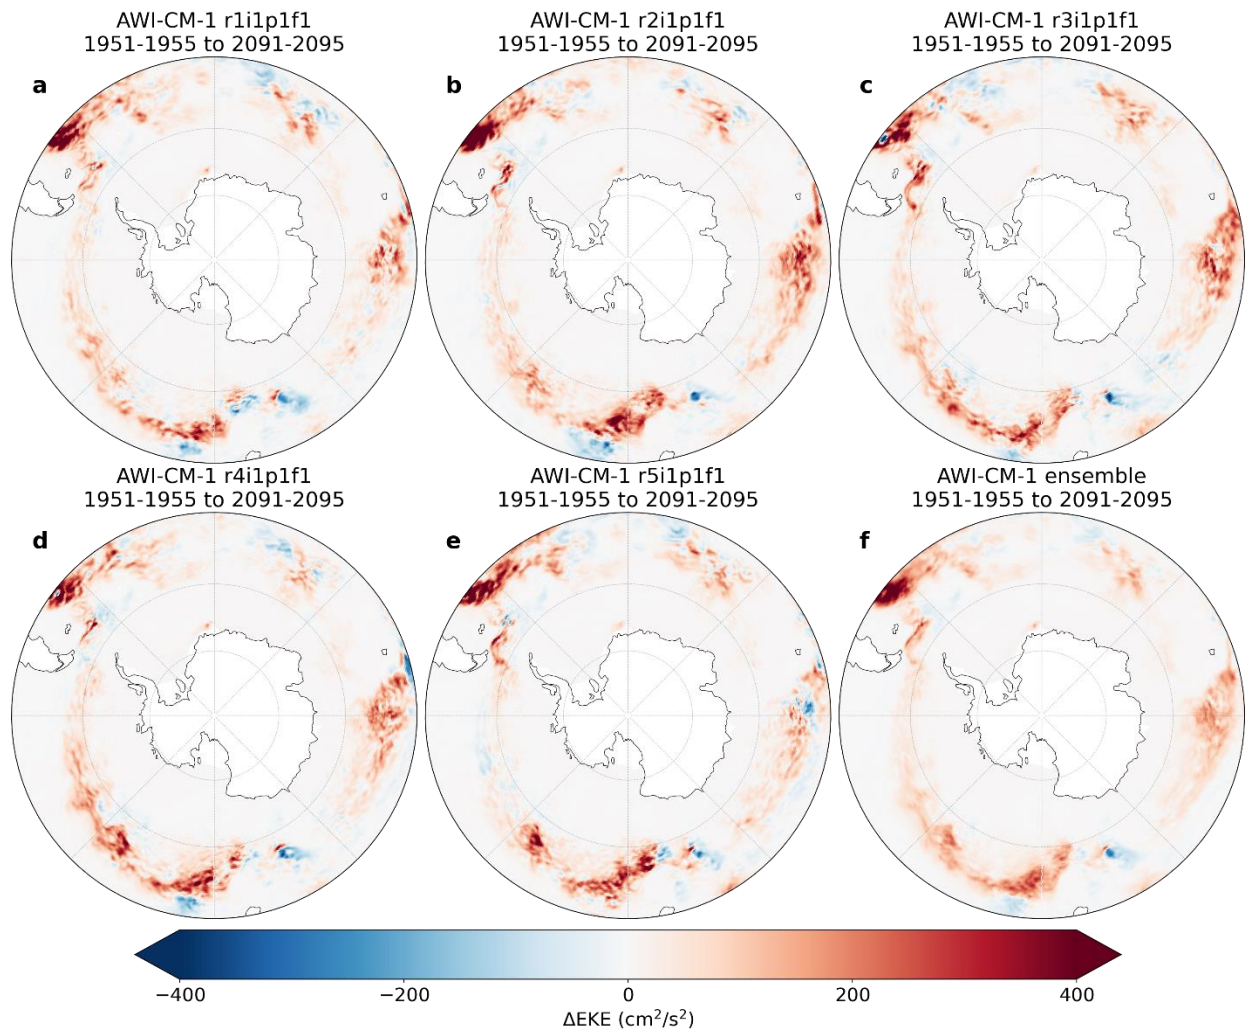

**Supplementary Figure 4. Ensemble spread of EKE change between 1951-1955 and 2091-2095. EKE change in (a-e) each member of the AWI-CM-1 ensemble and (f) the ensemble mean.**
